# Supplementary material for: Vegfa Impacts Early Myocardium Development in Zebrafish
Source: Int J Mol Sci. 2017 Feb 21;18(2):444. doi: 10.3390/ijms18020444 (PMC5343978; doi:10.3390/ijms18020444)
Supplement: Supplementary file 1 [file ijms-18-00444-s001.pdf]

# Supplementary Materials: Vegfa Impacts Early Myocardium Development in Zebrafish

Diqi Zhu, Yabo Fang, Kun Gao, Jie Shen, Tao P. Zhong and Fen Li

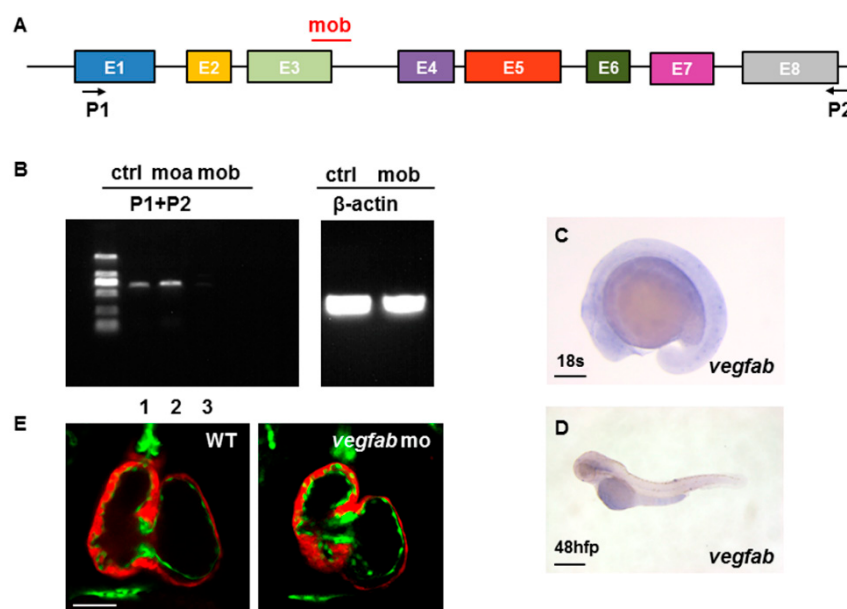

**Figure S1.** *vegfab* is not involved in early cardiovascular development in zebrafish. (A) Open boxes and black lines denote exons and introns of the early coding and non-coding region of *vegfab*. MO in red mark the target sites of the *vegfab* translation blocking. P1 and P2 indicate the sites of primers; (B) Fragments of *vegfab* sequences were amplified using the indicated primers. In *vegfab* morphant embryos, the normal *vegfab* RT-PCR product was not detected (lane 3).  $\beta$ -actin cDNA was also amplified from each sample as an internal control; (C,D) The expression of *vegfab* during early embryogenesis cannot be detected. Scale bar: 200  $\mu$ m (C); 500  $\mu$ m (D); (E) The heart development is almost normal with 10ng doses of *vegfab* MO at 96 hpf under the background of *Tg(myl7:mCherry)/Tg(kdrl:EGFP)* transgenic fish. Scale bar: 50  $\mu$ m.

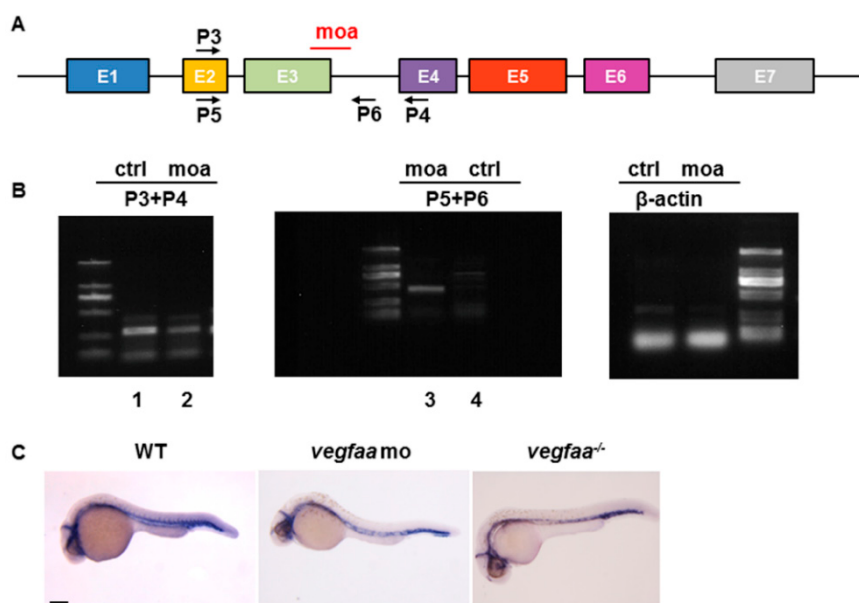

**Figure S2.** RT-PCR validation of morpholino efficacy for *vegfaa*. (A) Open boxes and black lines denote exons and introns of the first coding and non-coding region of *vegfaa*. MO in red mark the target sites of the *vegfaa* translation blocking. P3, P4, P5, and P6 indicate the sites of primers; (B) One- to two-cell embryos were injected with *vegfaa* MO, and cDNA at 24 hpf was isolated. In wild-type embryos, the normal *vegfaa* spliced P3–P4 RT-PCR product was observed (lane 1) but not the P5–P6 splice donor site PCR product (lane 3). In *vegfaa* morphants, the normal transcription level is decreased (lane 2) and the intron sequences are retained (lane 3). The  $\beta$ -actin cDNA was also amplified from each sample as a reference control; (C) Whole-mount in situ hybridizations (WISH) analysis of *cdh5* in WT, *vegfaa* morphants, and mutants at 30 hpf. The morphants and mutants display identical phenotype in arterial-venous differentiation and intersegmental vessel sprouting. Scale bar: 200  $\mu$ m.

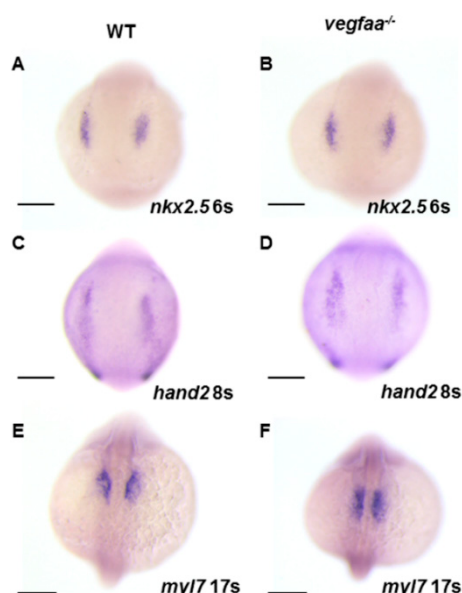

**Figure S3.** Normal pattern of cardiac progenitors and differentiation in *vegfaa* mutant embryos. (A–D) WISH demonstrates the expression of *nkx2.5* (A,B) and *hand2* (C,D) in wild-type (A,C) and *vegfaa* mutant (B,D) embryos; (E,F) WISH demonstrates the expression of *myl7* in wild-type (E) and *vegfaa* mutant (F) embryos at 17-somite stage. Dorsal views anterior to the top. Gene expression patterns appear normal in *vegfaa* mutants; no expansion or reduction of heart field size is evident. Scale bar: 200  $\mu$ m (A–F).

**Table S1.** Effect of *vegfaa* morpholino dosage on cardiac morphogenesis.

| MO Dosage | Die | Severe | Moderate | Noraml | Total |
|-----------|-----|--------|----------|--------|-------|
| 6 ng      | 23  | 57     | 1        | 1      | 82    |
| 5 ng      | 17  | 33     | 4        | 2      | 56    |
| 4 ng      | 4   | 34     | 25       | 3      | 66    |
| 3 ng      | 1   | 2      | 11       | 42     | 56    |

**Table S2.** List of primers used for RT-PCR.

| Primer | 5'—3'                     |
|--------|---------------------------|
| P1     | GCTTTCTGAGACCTTTACCAATGC  |
| P2     | TCTCAAGTCAGTTCGGTTCACCTCC |
| P3     | CCAAAGAAGGGGAAAGAGCA      |
| P4     | ATTATGCTGCGATACGCGTTG     |
| P5     | CCCACATACCCAAAGAA         |
| P6     | GCTGTCATCATGGCAA          |
